# Supplementary material
Source: MDPI journal article supplement (https://www.mdpi.com/1424-8247/17/5/609)
Supplement: s1 [file s1]

# **Evaluation of The Effect of Loratadine versus Diosmin/Hesperidin Combination on Vinca Alkaloids-Induced Neuropathy: A Randomized Controlled Clinical Trial**

**Noha Kamal <sup>1,\*</sup>, Mahmoud S. Abdallah <sup>1,2</sup>, Essam Abdel Wahed <sup>3</sup>, Nagwa A. Sabri <sup>4</sup> and Sarah Farid Fahmy <sup>4</sup>**

<sup>1</sup> Clinical Pharmacy Department, Faculty of Pharmacy, University of Sadat City (USC), Sadat City 32897, Egypt

<sup>2</sup> Department of PharmD, Faculty of Pharmacy, Jadara University, Irbid 21110, Jordan

<sup>3</sup> Hematology and Bone Marrow Transplantation Unit, Internal Medicine Department, Faculty of Medicine, Ain Shams University, Cairo 11591, Egypt

<sup>4</sup> Clinical Pharmacy Department, Faculty of Pharmacy, Ain Shams University, African Union Organization Street, Cairo 11566, Egypt; nagwa.sabri@pharma.asu.edu.eg (N.A.S.); sarah.farid@pharma.asu.edu.eg (S.F.F.)

\* Correspondence: noha.kamal@fop.usc.edu.eg; Tel.: +20-1002014552

**Table S1. Results of kidney function tests among the three groups at baseline and at the end of every cycle of vinca alkaloids in the three groups.**

| Parameters                          |                                     | Group 1<br>Control<br>(n=30) | Group 2<br>Diosmin/ Hesperidin<br>(n=30) | Group 3<br>Loratadine<br>(n=30) | p-values           |
|-------------------------------------|-------------------------------------|------------------------------|------------------------------------------|---------------------------------|--------------------|
| Serum creatinine<br>(mg/dL)         | At baseline                         | 0.79 (0.6-0.925)             | 0.8 (0.6-0.9)                            | 0.8 (0.7-1)                     | 0.324 <sup>a</sup> |
|                                     | At the end of 1 <sup>st</sup> cycle | 0.8 (0.6-0.9)                | 0.7 (0.6-0.8)                            | 0.7 (0.6-0.9)                   | 0.527 <sup>a</sup> |
|                                     | At the end of 2 <sup>nd</sup> cycle | 0.7 (0.5-0.925)              | 0.7 (0.6-0.8)                            | 0.7 (0.6-0.825)                 | 0.981 <sup>a</sup> |
|                                     | At the end of 3 <sup>rd</sup> cycle | 0.7 (0.5-0.87)               | 0.7 (0.58-0.9)                           | 0.7 (0.6-0.9)                   | 0.962 <sup>a</sup> |
|                                     | <b>p-value</b>                      | 0.380 <sup>b</sup>           | 0.645 <sup>b</sup>                       | <0.001 <sup>b*</sup>            |                    |
| BUN<br>(mg/dL)                      | At baseline                         | 14 (11-17.25)                | 13 (10.5-18)                             | 14 (11.75-18)                   | 0.753 <sup>a</sup> |
|                                     | At the end of 1 <sup>st</sup> cycle | 15.5 (12-22)                 | 17 (11.75-21)                            | 19.5 (15-22.5)                  | 0.152 <sup>a</sup> |
|                                     | At the end of 2 <sup>nd</sup> cycle | 16 (12.75-21)                | 16 (11-20)                               | 20.5 (15.3-23.3)                | 0.089 <sup>a</sup> |
|                                     | At the end of 3 <sup>rd</sup> cycle | 15.5 (12-22.25)              | 16 (10.75-22.5)                          | 17 (13-24)                      | 0.435 <sup>a</sup> |
|                                     | <b>p-value</b>                      | 0.046 <sup>b*</sup>          | 0.138 <sup>b</sup>                       | 0.004 <sup>b*</sup>             |                    |
| eGFR<br>(ml/min/1.7m <sup>2</sup> ) | At baseline                         | 106 (97.5-128.5)             | 114 (90-124.8)                           | 97 (86.75-120)                  | 0.198 <sup>a</sup> |
|                                     | At the end of 1 <sup>st</sup> cycle | 114.5 (90.75-131)            | 119.5 (105.8-132.3)                      | 106.5 (95.5-125)                | 0.491 <sup>a</sup> |
|                                     | At the end of 2 <sup>nd</sup> cycle | 116 (90-132)                 | 113.5 (106.5-131.3)                      | 110 (96.75-127.3)               | 0.741 <sup>a</sup> |
|                                     | At the end of 3 <sup>rd</sup> cycle | 116 (95.75-137)              | 121 (103.8-133.3)                        | 109.5 (99.5-124)                | 0.561 <sup>a</sup> |
|                                     | <b>p-value</b>                      | 0.266 <sup>b</sup>           | 0.723 <sup>b</sup>                       | 0.0002 <sup>b*</sup>            |                    |

<sup>a</sup>: Kruskal Wallis test was used for statistical analysis, <sup>b</sup>: Freidman ANOVA test was used for statistical analysis, \*: statistically significant, values are expressed as [median, (IQR)], for all statistical tests used  $p < 0.05$  considered statistically significant. BUN: Blood Urea Nitrogen, eGFR: estimated glomerular filtration rate calculated utilizing chronic kidney disease epidemiology collaboration (CKD-EPI) equation

**Table S2. Results of liver function tests among the three groups at baseline and at the end of every cycle of vinca alkaloids in the three groups.**

|                         | Parameters                          | Group 1<br>Control<br>(n=30) | Group 2<br>Diosmin/ Hesperidin<br>(n=30) | Group 3<br>Loratadine<br>(n=30) | <i>p</i> -values     |
|-------------------------|-------------------------------------|------------------------------|------------------------------------------|---------------------------------|----------------------|
| <b>Direct bilirubin</b> | At baseline                         | 0.25 (0.1- 0.425)            | 0.2 (0.1-0.3)                            | 0.16 (0.1-0.225)                | 0.0586 <sup>a</sup>  |
|                         | At the end of 1 <sup>st</sup> cycle | 0.2 (0.175-0.5)              | 0.2 (0.1-0.3)                            | 0.2 (0.1-0.2)                   | 0.0148 <sup>a*</sup> |
|                         | At the end of 2 <sup>nd</sup> cycle | 0.2 (0.1-0.48)               | 0.2 (0.1-0.3)                            | 0.2 (0.1-0.3)                   | 0.5661 <sup>a</sup>  |
|                         | At the end of 3 <sup>rd</sup> cycle | 0.2 (0.1-0.325)              | 0.2 (0.1-0.225)                          | 0.2 (0.1-0.3)                   | 0.2616 <sup>a</sup>  |
|                         | <i>p</i> -value                     | 0.901 <sup>b</sup>           | 0.886 <sup>b</sup>                       | 0.143 <sup>b</sup>              |                      |
| <b>Total bilirubin</b>  | At baseline                         | 0.7 (0.55-1.025)             | 0.7 (0.475-1)                            | 0.7 (0.575-0.825)               | 0.8729 <sup>a</sup>  |
|                         | At the end of 1 <sup>st</sup> cycle | 0.5 (0.3-0.75)               | 0.65 (0.40-0.8)                          | 0.6 (0.475-0.7)                 | 0.499 <sup>a</sup>   |
|                         | At the end of 2 <sup>nd</sup> cycle | 0.65 (0.3-0.875)             | 0.55 (0.4-0.925)                         | 0.7 (0.575-0.8)                 | 0.597 <sup>a</sup>   |
|                         | At the end of 3 <sup>rd</sup> cycle | 0.6 (0.4- 0.825)             | 0.55 (0.3-0.725)                         | 0.7 (0.55-0.925)                | 0.123 <sup>a</sup>   |
|                         | <i>p</i> -value                     | 0.280 <sup>b</sup>           | .012 <sup>b*</sup>                       | 0.051 <sup>b</sup>              |                      |
| <b>AST</b>              | At baseline                         | 25.5 (18-38.5)               | 23.5 (16.75-29.75)                       | 29.5 (22-36)                    | 0.3701 <sup>a</sup>  |
|                         | At the end of 1 <sup>st</sup> cycle | 30 (15.75-47)                | 17.5 (13.75-26)                          | 28 (16-37)                      | 0.039 <sup>a</sup>   |
|                         | At the end of 2 <sup>nd</sup> cycle | 28 (16-44.25)                | 21 (14.75-32.25)                         | 30.5 (17.25-44)                 | 0.137 <sup>a</sup>   |
|                         | At the end of 3 <sup>rd</sup> cycle | 22.5 (14.75- 31.5)           | 19.5 (14.75-29.75)                       | 28 (18.75- 43.25)               | 0.035 <sup>a*</sup>  |
|                         | <i>p</i> -value                     | 0.065 <sup>b</sup>           | 0.561 <sup>b</sup>                       | 0.441 <sup>b</sup>              |                      |
| <b>ALT</b>              | At baseline                         | 26.5 (16-36.5)               | 18.5 (11.75-24.75)                       | 19 (15-34)                      | 0.260 <sup>a</sup>   |
|                         | At the end of 1 <sup>st</sup> cycle | 26.5 (11-44.25)              | 16.5 (11-31.25)                          | 21.5 (12.75-34.25)              | 0.385 <sup>a</sup>   |
|                         | At the end of 2 <sup>nd</sup> cycle | 22 (15.75-43.5)              | 18 (14.75-28)                            | 24 (16.75-40.5)                 | 0.140 <sup>a</sup>   |
|                         | At the end of 3 <sup>rd</sup> cycle | 19 (12.75-36.25)             | 17.5 (10.75-25)                          | 29.5 (18- 47)                   | 0.014 <sup>a*</sup>  |
|                         | <i>p</i> -value                     | 0.756 <sup>b</sup>           | 0.824 <sup>b</sup>                       | 0.064 <sup>b</sup>              |                      |

<sup>a</sup>: Kruskal Wallis test was used for statistical analysis, <sup>b</sup>: Freidman ANOVA test was used for statistical analysis, \*: statistically significant, values are expressed as [median, (IQR)], for all statistical tests used  $p < 0.05$  considered statistically significant. ALT: Alanine Aminotransferase, AST: Aspartate Aminotransferase.

**Table S3. Results of blood cells` counts among the three groups at baseline and at the end of every cycle of vinca alkaloids in the three groups in the three groups.**

| Parameters         | Group 1                             | Group 2                       | Group 3              | <i>p</i> -values   |
|--------------------|-------------------------------------|-------------------------------|----------------------|--------------------|
|                    | Control<br>(n=30)                   | Diosmin/ Hesperidin<br>(n=30) | Loratadine<br>(n=30) |                    |
| <b>Hemoglobin</b>  | At baseline                         | 8.7 (7.58-10.08)              | 8.45 (7.28-10.25)    | 0.825 <sup>a</sup> |
|                    | At the end of 1 <sup>st</sup> cycle | 9.05 (8.6-10.1)               | 8.45 (8.15-10.625)   | 0.371 <sup>a</sup> |
|                    | At the end of 2 <sup>nd</sup> cycle | 9.25 (8.5-10.38)              | 9.3 (8.73-9.85)      | 0.455 <sup>a</sup> |
|                    | At the end of 3 <sup>rd</sup> cycle | 10 (9.35-10.73)               | 9.3 (8.73-9.85)      | 0.105 <sup>a</sup> |
|                    | <i>p</i> -value                     | 0.038 <sup>b*</sup>           | 0.27 <sup>b</sup>    |                    |
| <b>Platelets</b>   | At baseline                         | 77.5 (39.5-145.5)             | 50.5 (25.25-201.5)   | 0.708 <sup>a</sup> |
|                    | At the end of 1 <sup>st</sup> cycle | 90 (63.5-201.75)              | 100.5 (38.98 -203)   | 0.927 <sup>a</sup> |
|                    | At the end of 2 <sup>nd</sup> cycle | 111.5 (66.3 -246.3)           | 120 (50.75-175.5)    | 0.469 <sup>a</sup> |
|                    | At the end of 3 <sup>rd</sup> cycle | 132.5 (96.5-235)              | 142.5 (50-195)       | 0.485 <sup>a</sup> |
|                    | <i>p</i> -value                     | 0.046 <sup>b*</sup>           | 0.265 <sup>b</sup>   |                    |
| <b>Neutrophils</b> | At baseline                         | 2.56 (1.46-5.4)               | 2.995(0.98-5.38)     | 0.942 <sup>a</sup> |
|                    | At the end of 1 <sup>st</sup> cycle | 2.12 (1.075-4.38)             | 3 (1.36-5.85)        | 0.811 <sup>a</sup> |
|                    | At the end of 2 <sup>nd</sup> cycle | 2.24 (1.5- 4.85)              | 2.45 (1.98-4.125)    | 0.807 <sup>a</sup> |
|                    | At the end of 3 <sup>rd</sup> cycle | 2.82 (1.7-5.53)               | 2.85 (2.09-4.725)    | 0.950 <sup>a</sup> |
|                    | <i>p</i> -value                     | 0.289 <sup>b</sup>            | 0.716 <sup>b</sup>   |                    |
| <b>TLC</b>         | At baseline                         | 5.75 (2.898-35.25)            | 9.05 (2.925-53.05)   | 0.530 <sup>a</sup> |
|                    | At the end of 1 <sup>st</sup> cycle | 5.1 (2.6-8.13)                | 7.25 (4.25-14.55)    | 0.160 <sup>a</sup> |
|                    | At the end of 2 <sup>nd</sup> cycle | 5.95 (3.1-7.68)               | 6.25 (3.98-12.25)    | 0.5 <sup>a</sup>   |
|                    | At the end of 3 <sup>rd</sup> cycle | 6.2 (3.65-9.1)                | 7 (4.2-11.3)         | 0.632 <sup>a</sup> |
|                    | <i>p</i> -value                     | 0.247 <sup>b</sup>            | 0.233 <sup>b</sup>   |                    |

<sup>a</sup>: Kruskal Wallis test was used for statistical analysis, <sup>b</sup>: Freidman ANOVA test was used for statistical analysis, \*: statistically significant, values are expressed as [median, (IQR)], for all statistical tests used  $p < 0.05$  considered statistically significant. TLC: Total Leucocyte Count. Within group1, the hemoglobin level increased across the cycles but there was no significant difference compared to other groups. In group 2, platelets count increased from baseline to the 2nd cycle ( $p < 0.001$ ) and 3rd cycle ( $p < 0.001$ ). Platelets counts also increased in group 1 after the end of 3rd cycle ( $p = 0.031$ ) compared to baseline in group 1. The platelet count increased in group 3 as well, although it was not deemed significantly different.

**Table S4. The functional assessment of cancer therapy/gynecologic oncology group–neurotoxicity (FACT/GOG-Ntx) score results in the three groups.**

|            |                                     | <b>Group 1</b>        | <b>Group 2</b>            | <b>Group 3</b>        |                    |
|------------|-------------------------------------|-----------------------|---------------------------|-----------------------|--------------------|
|            | <b>Subscale</b>                     | <b>Control</b>        | <b>Diosmin/Hesperidin</b> | <b>Loratadine</b>     | <b>p-values</b>    |
|            |                                     | <b>(n=30)</b>         | <b>(n=30)</b>             | <b>(n=30)</b>         |                    |
| <b>PWB</b> | At baseline                         | 19.75 (16-22.5)       | 22.5 (17.75-24)           | 21 (17.75-25)         | 0.737 <sup>a</sup> |
|            | At the end of 1 <sup>st</sup> cycle | 17 (16-20)            | 21 (15.75-23)             | 19 (16-23)            | 0.950 <sup>a</sup> |
|            | At the end of 2 <sup>nd</sup> cycle | 16 (14-17)            | 19.5 (14.75-21)           | 17.5 (14.75-22)       | 0.748 <sup>a</sup> |
|            | At the end of 3 <sup>rd</sup> cycle | 14.75 (12-16)         | 18.5 (13.75-20)           | 16 (13-20.25)         | 0.594 <sup>a</sup> |
|            | <b>p-value</b>                      | <0.0001 <sup>b*</sup> | <0.0001 <sup>b*</sup>     | <0.0001 <sup>b*</sup> |                    |
| <b>SWB</b> | At baseline                         | 21 (18-23)            | 21 (17.75-24)             | 23.5 (19-25)          | 0.206 <sup>a</sup> |
|            | At the end of 1 <sup>st</sup> cycle | 21 (17.75-22)         | 20 (17-23.25)             | 22.5 (19-24.25)       | 0.317 <sup>a</sup> |
|            | At the end of 2 <sup>nd</sup> cycle | 20 (15.75-22)         | 20 (16.75-22)             | 21 (18-23.25)         | 0.5 <sup>a</sup>   |
|            | At the end of 3 <sup>rd</sup> cycle | 20 (16-22)            | 19.5 (17-22)              | 20 (18-23.25)         | 0.503 <sup>a</sup> |
|            | <b>p-value</b>                      | <0.0001 <sup>b*</sup> | <0.0001 <sup>b*</sup>     | <0.0001 <sup>b*</sup> |                    |
| <b>EWB</b> | At baseline                         | 20 (18.75-22)         | 21 (18-22)                | 20 (19-22)            | 0.764 <sup>a</sup> |
|            | At the end of 1 <sup>st</sup> cycle | 19 (17.75- 21)        | 20 (18-21.25)             | 20 (18.75-21)         | 0.719 <sup>a</sup> |
|            | At the end of 2 <sup>nd</sup> cycle | 18 (17-19)            | 19.5 (17-21)              | 19 (17-20)            | 0.234 <sup>a</sup> |
|            | At the end of 3 <sup>rd</sup> cycle | 17 (16-18.25)         | 19 (16.75-20)             | 18 (16-19)            | 0.186 <sup>a</sup> |
|            | <b>p-value</b>                      | <0.0001 <sup>b*</sup> | <0.0001 <sup>b*</sup>     | <0.0001 <sup>b*</sup> |                    |
| <b>FWB</b> | At baseline                         | 17 (13.75-19)         | 16 (13.75-18)             | 16.5 (13.75-19)       | 0.945 <sup>a</sup> |
|            | At the end of 1 <sup>st</sup> cycle | 15 (13.75-18)         | 15 (12.75-17)             | 15 (12.75-17)         | 0.802 <sup>a</sup> |
|            | At the end of 2 <sup>nd</sup> cycle | 14 (12-18)            | 14 (12-16)                | 14 (11-16)            | 0.5 <sup>a</sup>   |
|            | At the end of 3 <sup>rd</sup> cycle | 13 (11-17)            | 13.5 (11-15.25)           | 13.5 (10-15)          | 0.514 <sup>a</sup> |
|            | <b>p-value</b>                      | <0.0001 <sup>b*</sup> | <0.0001 <sup>b*</sup>     | <0.0001 <sup>b*</sup> |                    |

**Cont. Table S4. The functional assessment of cancer therapy/gynecologic oncology group–neurotoxicity (FACT/GOG-Ntx) score results in the three groups.**

|                     |                                     |                       |                       |                       |                    |
|---------------------|-------------------------------------|-----------------------|-----------------------|-----------------------|--------------------|
| <b>FACT/GOG-Ntx</b> | At baseline                         | 120 (115-125.3)       | 120.5 (113.3-125.5)   | 123 (116-127)         | 0.932 <sup>a</sup> |
|                     | At the end of 1 <sup>st</sup> cycle | 114 (108.8-117.3)     | 116 (108-122.5)       | 115 (111-124)         | 0.655 <sup>a</sup> |
|                     | At the end of 2 <sup>nd</sup> cycle | 106 (104-112.8)       | 112 (104.5-118.3)     | 109 (105-117)         | 0.16 <sup>a</sup>  |
|                     | At the end of 3 <sup>rd</sup> cycle | 104 (100.5-108)       | 110.5 (101.8-116.3)   | 107 (101-115)         | 0.217 <sup>a</sup> |
|                     | <b><i>p</i>-value</b>               | <0.0001 <sup>b*</sup> | <0.0001 <sup>b*</sup> | <0.0001 <sup>b*</sup> |                    |

<sup>a</sup>: Kruskal Wallis test was used for statistical analysis, <sup>b</sup>: Freidman ANOVA test was used for statistical analysis, N.B. the table excludes neuropathy subscale as it is presented in the original paper, \*: statistically significant, values are expressed as [median, (IQR)], for all statistical tests used  $p < 0.05$  considered statistically significant. EWB: emotional well-being, FACT/GOG-Ntx: functional assessment of cancer therapy/gynecologic oncology group –neurotoxicity total score, FWB: Functional Well-Being, PWB: physical well-being, and SWB: social/family well-being

**Table S5. The severity of non-neuropathy related adverse effects in the three groups through the three cycles of vinca alkaloids.**

| Adverse drug effect                    |                                   | Group 1<br>(n=30)  | Group 2<br>(n=30)  | Group 3<br>(n=30)  | p-values           |
|----------------------------------------|-----------------------------------|--------------------|--------------------|--------------------|--------------------|
| <b>Bone Pain</b><br>[n, (%)]           | Through the 1 <sup>st</sup> cycle | Grade 1: 1 (3.3%)  | Grade 1: 1 (3.3%)  | Grade 1: 3 (10%)   | 0.613 <sup>a</sup> |
|                                        | Through the 2 <sup>nd</sup> cycle | Grade 1: 1 (3.3%)  | Grade 1: 0 (0%)    | Grade 1: 2 (6.7%)  | 0.77 <sup>a</sup>  |
|                                        | Through the 3 <sup>rd</sup> cycle | Grade 1: 0 (0%)    | Grade 1: 0 (0%)    | Grade 1: 1 (3.3%)  | 0.521 <sup>a</sup> |
| <b>Headache</b><br>[n, (%)]            | Through the 1 <sup>st</sup> cycle | Grade 1: 3 (10%)   | Grade 1: 0 (0%)    | Grade 1: 0 (0%)    | 0.149 <sup>a</sup> |
|                                        | Through the 2 <sup>nd</sup> cycle | Grade 1: 0 (0%)    | Grade 1: 1 (3.3%)  | Grade 1: 1 (3.3%)  | 1 <sup>a</sup>     |
|                                        | Through the 3 <sup>rd</sup> cycle | Grade 1: 0 (0%)    | Grade 1: 1 (3.3%)  | Grade 1: 0 (0%)    | 1 <sup>a</sup>     |
| <b>Nausea</b><br>[n, (%)]              | Through the 1 <sup>st</sup> cycle | Grade 1: 1 (3.3%)  | Grade 1: 0 (0%)    | Grade 1: 1 (3.3%)  | 1 <sup>a</sup>     |
|                                        | Through the 2 <sup>nd</sup> cycle | Grade 1: 0 (0%)    | Grade 1: 1 (3.3%)  | Grade 1: 3 (10%)   | 0.122 <sup>a</sup> |
|                                        | Through the 3 <sup>rd</sup> cycle | Grade 2: 0 (0%)    | Grade 2: 0 (0%)    | Grade 2: 1 (3.3%)  |                    |
| <b>Vomiting</b><br>[n, (%)]            | Through the 1 <sup>st</sup> cycle | Grade 1: 1 (3.3%)  | Grade 1: 0 (0%)    | Grade 1: 0 (0%)    | 1 <sup>a</sup>     |
|                                        |                                   | Grade 2: 0 (0%)    | Grade 2: 0 (0%)    | Grade 2: 0 (0%)    |                    |
|                                        | Through the 2 <sup>nd</sup> cycle | Grade 1: 1 (3.3%)  | Grade 1: 0 (0%)    | Grade 1: 0 (0%)    | 1 <sup>a</sup>     |
|                                        |                                   | Grade 2: 0 (0%)    | Grade 2: 0 (0%)    | Grade 2: 0 (0%)    |                    |
|                                        | Through the 3 <sup>rd</sup> cycle | Grade 1: 1 (3.3%)  | Grade 1: 0 (0%)    | Grade 1: 0 (0%)    | 1 <sup>a</sup>     |
|                                        |                                   | Grade 2: 0 (0%)    | Grade 2: 0 (0%)    | Grade 2: 0 (0%)    |                    |
| <b>Bilirubin increased</b><br>[n, (%)] | Through the 1 <sup>st</sup> cycle | Grade 1: 4 (13.3%) | Grade 1: 3 (10%)   | Grade 1: 8 (26.7%) | 0.326 <sup>a</sup> |
|                                        |                                   | Grade 2: 4 (13.3%) | Grade 2: 3 (10%)   | Grade 2: 1 (3.3%)  |                    |
|                                        | Through the 2 <sup>nd</sup> cycle | Grade 1: 2 (6.7%)  | Grade 1: 4 (13.3%) | Grade 1: 3 (10%)   | 0.584 <sup>a</sup> |
|                                        |                                   | Grade 2: 1 (3.3%)  | Grade 2: 2 (6.7%)  | Grade 2: 0 (0%)    |                    |
|                                        | Through the 3 <sup>rd</sup> cycle | Grade 1: 4 (13.3%) | Grade 1: 1 (3.3%)  | Grade 1: 4 (13.3%) | 0.204 <sup>a</sup> |
|                                        |                                   | Grade 2: 2 (6.7%)  | Grade 2: 0 (0%)    | Grade 2: 0 (0%)    |                    |
| <b>ALT increased</b><br>[n, (%)]       | Through the 1 <sup>st</sup> cycle | Grade 3: 1 (3.3%)  | Grade 3: 0 (0%)    | Grade 3: 0 (0%)    | 1 <sup>a</sup>     |
|                                        | Through the 2 <sup>nd</sup> cycle | Grade 1: 2 (6.7%)  | Grade 1: 2 (6.7%)  | Grade 1: 0 (0%)    | 0.540 <sup>a</sup> |
|                                        |                                   | Grade 3: 0 (0%)    | Grade 3: 0 (0%)    | Grade 3: 1 (3.3%)  |                    |
|                                        | Through the 3 <sup>rd</sup> cycle | Grade 2: 0 (0%)    | Grade 2: 0 (0%)    | Grade 2: 1 (3.3%)  | 1 <sup>a</sup>     |
| <b>ALT increased</b><br>[n, (%)]       | Through the 1 <sup>st</sup> cycle | Grade 1: 1 (3.3%)  | Grade 1: 0 (0%)    | Grade 1: 1 (3.3%)  | 1 <sup>a</sup>     |
|                                        | Through the 2 <sup>nd</sup> cycle | Grade 1: 3 (10%)   | Grade 1: 1 (3.3%)  | Grade 1: 0 (0%)    | 0.318 <sup>a</sup> |
|                                        |                                   | Grade 3: 0 (0%)    | Grade 3: 0 (0%)    | Grade 3: 1 (3.3%)  |                    |
|                                        | Through the 3 <sup>rd</sup> cycle | Grade 1: 0 (0%)    | Grade 1: 0 (0%)    | Grade 1: 2 (6.7%)  | 0.326 <sup>a</sup> |

**Cont. Table S5. The severity of non-neuropathy related adverse effects in the three groups through the three cycles of vinca alkaloids.**

|                                  |                                   |                               |                               |                               |                    |
|----------------------------------|-----------------------------------|-------------------------------|-------------------------------|-------------------------------|--------------------|
| <b>AST increased</b><br>[n, (%)] | Through the 1 <sup>st</sup> cycle | Grade 1: 1 (3.3%)             | Grade 1: 0 (0%)               | Grade 1: 1 (3.3%)             | 1 <sup>a</sup>     |
|                                  | Through the 2 <sup>nd</sup> cycle | Grade 1: 3 (10%)              | Grade 1: 1 (3.3%)             | Grade 1: 0 (0%)               | 0.318 <sup>a</sup> |
|                                  |                                   | Grade 3: 0 (0%)               | Grade 3: 0 (0%)               | Grade 3: 1 (3.3%)             |                    |
|                                  | Through the 3 <sup>rd</sup> cycle | Grade 1: 0 (0%)               | Grade 1: 0 (0%)               | Grade 1: 2 (6.7%)             | 0.326 <sup>a</sup> |
| <b>Diarrhea</b><br>[n, (%)]      | Through the 1 <sup>st</sup> cycle | Grade 1: 2 (6.7%)             | Grade 1: 5 (16.7%)            | Grade 1: 3 (10%)              | 0.592 <sup>a</sup> |
|                                  | Through the 2 <sup>nd</sup> cycle | Grade 1: 1 (3.3%)             | Grade 1: 0 (0%)               | Grade 1: 0 (0%)               | 1 <sup>a</sup>     |
|                                  | Through the 3 <sup>rd</sup> cycle | Grade 1: 0 (0%)               | Grade 1: 3 (10%)              | Grade 1: 1 (3.3%)             | 0.318 <sup>a</sup> |
| <b>Edema</b><br>[n, (%)]         | Through the 1 <sup>st</sup> cycle | Grade 1 Edema limbs: 2 (6.7%) | Grade 1 Edema limbs: 2 (6.7%) | Grade 1 Edema limbs: 2 (6.7%) | 1 <sup>a</sup>     |
|                                  | Through the 2 <sup>nd</sup> cycle | Grade 1 Edema limbs: 2 (6.7%) | Grade 1 Edema limbs: 2 (6.7%) | Grade 1 Edema limbs: 0 (0%)   | 0.463 <sup>a</sup> |
|                                  |                                   | Grade 1 Edema Face: 0 (0%)    | Grade 1 Edema Face: 1 (3.3%)  | Grade 1 Edema Face: 0 (0%)    |                    |
|                                  | Through the 3 <sup>rd</sup> cycle | Grade 1 Edema limbs: 1 (3.3%) | Grade 1 Edema limbs: 1 (3.3%) | Grade 1 Edema limbs: 0 (0%)   | 0.77 <sup>a</sup>  |
|                                  |                                   | Grade 1 Edema Face: 0 (0%)    | Grade 1 Edema Face: 1 (3.3%)  | Grade 1 Edema Face: 0 (0%)    |                    |
|                                  |                                   |                               |                               |                               |                    |

<sup>a</sup>: Fisher's Exact Test was used for statistical analysis. AST: Aspartate Aminotransferase, ALT: Alanine Aminotransferase. For all statistical tests used, p<0.05 is considered statistically significant.



**Table S6. Common Terminology Criteria for Adverse Events (CTCAE) definitions for adverse effects encountered in the current study.**

|                                             |                                                                                                                                                              |
|---------------------------------------------|--------------------------------------------------------------------------------------------------------------------------------------------------------------|
| <b>Abdominal pain</b>                       |                                                                                                                                                              |
| Definition                                  | “A disorder characterized by a sensation of marked discomfort in the abdominal region.”                                                                      |
| Grades                                      | Grade 1: “Mild pain.”                                                                                                                                        |
| <b>Alanine aminotransferase increased</b>   |                                                                                                                                                              |
| Definition                                  | “A finding based on laboratory test results that indicate an increase in the level of alanine aminotransferase (ALT or SGPT) in the blood specimen.”         |
| Grades                                      | Grade 1: “>ULN - 3.0 x ULN if baseline was normal; 1.5 - 3.0 x baseline if baseline was abnormal.”                                                           |
| <b>Aspartate aminotransferase increased</b> |                                                                                                                                                              |
| Definition                                  | “A finding based on laboratory test results that indicate an increase in the level of aspartate aminotransferase (AST or SGOT) in a blood specimen.”         |
| Grades                                      | Grade 1: “>ULN - 3.0 x ULN if baseline was normal; 1.5 - 3.0 x baseline if baseline was abnormal.”                                                           |
| <b>Blood bilirubin increased</b>            |                                                                                                                                                              |
| Definition                                  | “A finding based on laboratory test results that indicate an abnormally high level of bilirubin in the blood. Excess bilirubin is associated with jaundice.” |
| Grades                                      | Grade 1: “>ULN - 1.5 x ULN if baseline was normal; > 1.0 - 1.5 x baseline if baseline was abnormal.”                                                         |
| <b>Blurred vision</b>                       |                                                                                                                                                              |
| Definition                                  | “A disorder characterized by visual perception of unclear or fuzzy images.”                                                                                  |
| Grades                                      | Grade 1: “Intervention not indicated.”                                                                                                                       |
| <b>Bone pain</b>                            |                                                                                                                                                              |
| Definition                                  | “A disorder characterized by a sensation of marked discomfort in the bones.”                                                                                 |
| Grades                                      | Grade 1: “Mild pain.”                                                                                                                                        |

**Cont. Table S6. Common Terminology Criteria for Adverse Events (CTCAE) definitions for adverse effects encountered in the current study.**

|                     |                                                                                                                                                                                     |
|---------------------|-------------------------------------------------------------------------------------------------------------------------------------------------------------------------------------|
| <b>Constipation</b> |                                                                                                                                                                                     |
| Definition          | “A disorder characterized by irregular and infrequent or difficult evacuation of the bowels.”                                                                                       |
| Grades              | Grade 1: “Occasional or intermittent symptoms; occasional use of stool softeners, laxatives, dietary modification, or enema.”                                                       |
| <b>Diarrhea</b>     |                                                                                                                                                                                     |
| Definition          | “A disorder characterized by an increase in frequency and/or loose or watery bowel movements.”                                                                                      |
| Grades              | Grade 1: “Increase of <4 stools per day over baseline; mild increase in ostomy output compared to baseline.”                                                                        |
| <b>Dysuria</b>      |                                                                                                                                                                                     |
| Definition          | “A disorder characterized by painful urination.”                                                                                                                                    |
| Grades              | Grade 1: “Present.”                                                                                                                                                                 |
| <b>Edema face</b>   |                                                                                                                                                                                     |
| Definition          | “A disorder characterized by swelling due to excessive fluid accumulation in facial tissues.”                                                                                       |
| Grades              | Grade 1: “Localized facial edema.”                                                                                                                                                  |
| <b>Edema limbs</b>  |                                                                                                                                                                                     |
| Definition          | “A disorder characterized by swelling due to excessive fluid accumulation in the upper or lower extremities.”                                                                       |
| Grades              | Grade 1: “5 - 10% inter-limb discrepancy in volume or circumference at point of greatest visible difference; swelling or obscuration of anatomic architecture on close inspection.” |

**Cont. Table S6. Common Terminology Criteria for Adverse Events (CTCAE) definitions for adverse effects encountered in the current study.**

|                    |                                                                                                                                                                           |
|--------------------|---------------------------------------------------------------------------------------------------------------------------------------------------------------------------|
| <b>Headache</b>    |                                                                                                                                                                           |
| Definition         | “A disorder characterized by a sensation of marked discomfort in various parts of the head, not confined to the area of distribution of any nerve.”                       |
| Grades             | Grade 1: “Mild pain.”                                                                                                                                                     |
| <b>Myalgia</b>     |                                                                                                                                                                           |
| Definition         | “A disorder characterized by marked discomfort sensation originating from a muscle or group of muscles.”                                                                  |
| Grades             | Grade 1: “Mild pain.”                                                                                                                                                     |
| <b>Nausea</b>      |                                                                                                                                                                           |
| Definition         | “A disorder characterized by a queasy sensation and/or the urge to vomit.”                                                                                                |
| Grades             | Grade 1: “Loss of appetite without alteration in eating habits.”                                                                                                          |
| <b>Paresthesia</b> |                                                                                                                                                                           |
| Definition         | “A disorder characterized by functional disturbances of sensory neurons resulting in abnormal cutaneous sensations of tingling, numbness, pressure, cold, and/or warmth.” |
| Grades             | Grade 1: “Mild symptoms.”                                                                                                                                                 |
| <b>Vomiting</b>    |                                                                                                                                                                           |
| Definition         | “A disorder characterized by the reflexive act of ejecting the contents of the stomach through the mouth.”                                                                |
| Grades             | Grade 1: “Intervention not indicated.”                                                                                                                                    |

**Table S7. Mean adverse effect free time and hazard ratio of developing neuropathy related adverse drug effects among the three groups.**

| <b>Neuropathy<br/>related adverse<br/>effect</b> | <b>Group 1<br/>Mean adverse<br/>effect free time<br/>(months)</b> | <b>Group 2<br/>Mean adverse<br/>effect free time<br/>(months)</b> | <b>Group 3<br/>Mean adverse<br/>effect free time<br/>(months)</b> | <b>Hazard<br/>ratio</b> | <b>95% Confidence<br/>interval of hazard<br/>ratio</b> |
|--------------------------------------------------|-------------------------------------------------------------------|-------------------------------------------------------------------|-------------------------------------------------------------------|-------------------------|--------------------------------------------------------|
| Constipation                                     | 2.58                                                              | 2.61                                                              | 2.7                                                               | 0.766                   | (0.577-1.018)                                          |
| Paresthesia                                      | 2.79                                                              | 2.93                                                              | 2.96                                                              | 0.304                   | (0.146-0.631)                                          |
| Dysuria                                          | 2.89                                                              | 2.95                                                              | 2.95                                                              | 0.434                   | (0.204-0.932)                                          |
| Abdominal pain                                   | 2.86                                                              | 2.89                                                              | 2.81                                                              | 1.232                   | (0.758-1.933)                                          |
| Myalgia                                          | 2.92                                                              | 2.97                                                              | 3                                                                 | 0.347                   | (0.087-1.377)                                          |
| Blurred vision                                   | 2.98                                                              | 2.97                                                              | 3                                                                 | 0.974                   | (0.331-2.863)                                          |

Mean adverse effect free time was computed using Kaplan Meier analysis, Cox regression analysis was utilized for calculation of hazard ratios with group 3 as the reference group and 95% confidence intervals, adverse effect free time is expressed in months.

**Table S8. Noteworthy drug-drug interactions encountered during the study period.**

| Study group<br>(number of patients)           | Interacting medications                                         | Risk rating | Mechanism                                                                                                                    | Recommendation                                                                                                                                                                                                                         |
|-----------------------------------------------|-----------------------------------------------------------------|-------------|------------------------------------------------------------------------------------------------------------------------------|----------------------------------------------------------------------------------------------------------------------------------------------------------------------------------------------------------------------------------------|
| Group 1: (2)<br>Group 2: (3)<br>Group 3: (2)  | Amphotericin B and Prednisolone                                 | C           | Corticosteroids (Systemic) may enhance the hypokalemic effect of Amphotericin B.                                             | Monitor cardiac function and serum electrolytes (especially potassium) if systemic corticosteroids are co-administered with amphotericin B.                                                                                            |
| Group 1: (3)<br>Group 2: (5)<br>Group 3: (4)  | Amphotericin B and Vinca alkaloids/Cyclophosphamide/Doxorubicin | C           | Antineoplastic Agents may enhance the adverse/toxic effect of Amphotericin B.                                                | Monitor for possible increases in renal toxicity, bronchospasm, and hypotension if amphotericin is given concomitantly with antineoplastic agents.                                                                                     |
| Group 1: (2)<br>Group 2: (4)<br>Group 3: (0)  | Cyclophosphamide and Doxorubicin                                | C           | Cyclophosphamide may enhance the cardiotoxic effect of doxorubicin.                                                          | Monitor cardiac function closely. The cardiotoxic effects of these agents may be additive or synergistic. Administration of cyclophosphamide by infusion or twice daily or using liposomal anthracycline formulations may reduce risk. |
| Group 1: (0)<br>Group 2 : (2)<br>Group 3: (1) | Cyclophosphamide and Hydrochlorothiazide                        | C           | Thiazide Diuretics may enhance the adverse/toxic effect of cyclophosphamide. Specifically, granulocytopenia may be enhanced. | Monitor for signs and symptoms of hematological toxicity.                                                                                                                                                                              |

Cont. Table S8. Noteworthy drug-drug interactions encountered during the study period.

| Study group (number of patients)              | Interacting medications |                      | Risk rating | Mechanism                                                                                                    | Recommendation                                                                                                                                                                          |
|-----------------------------------------------|-------------------------|----------------------|-------------|--------------------------------------------------------------------------------------------------------------|-----------------------------------------------------------------------------------------------------------------------------------------------------------------------------------------|
| Group 1: (0)<br>Group 2: (26)<br>Group 3: (0) | Diosmin                 | and<br>doxorubicin*  | X*          | P-glycoprotein/ABCB1 Inhibitors may increase the serum concentration of doxorubicin (Conventional).          | Avoid concomitant use of doxorubicin and P-glycoprotein (P-gp) inhibitors.                                                                                                              |
| Group 1: (1)<br>Group 2: (2)<br>Group 3: (1)  | Fluconazole             | and<br>ciprofloxacin | C           | Corticosteroids (Systemic) may enhance the adverse/toxic effect of Quinolones.                               | Monitor patients closely for new-onset tendon or joint pain. The risk may be further increased in older patients (> 60 years) and in recipients of heart, lung, and kidney transplants. |
| Group 1: (1)<br>Group 2: (1)<br>Group 3: (2)  | Fluconazole             | and<br>doxorubicin   | X           | Moderate CYP3A4 Inhibitors (Fluconazole) may increase the serum concentration of doxorubicin (Conventional). | Avoid coadministration of doxorubicin with moderate CYP3A4 inhibitors due to the risk of increased doxorubicin adverse effects.                                                         |

Cont. Table S8. Noteworthy drug-drug interactions encountered during the study period.

| Study group (number of patients)                | Interacting medications |                     | Risk rating | Mechanism                                                                                                               |           |                                | Recommendation                                                                                                                                                                                                                                                                                         |
|-------------------------------------------------|-------------------------|---------------------|-------------|-------------------------------------------------------------------------------------------------------------------------|-----------|--------------------------------|--------------------------------------------------------------------------------------------------------------------------------------------------------------------------------------------------------------------------------------------------------------------------------------------------------|
| Group 1: (22)<br>Group 2: (20)<br>Group 3: (23) | Fluconazole             | and<br>levofloxacin | C           | QT-prolonging (Levofloxacin) may enhance the QTc-prolonging effect of QT-prolonging Inhibitors (Fluconazole).           | Quinolone | Antibiotics<br>Moderate CYP3A4 | Monitor for QTc interval prolongation and ventricular arrhythmias. Patients with other risk factors (eg, older age, female sex, bradycardia, hypokalemia, hypomagnesemia, heart disease, and higher drug concentrations) are likely at greater risk for these potentially life-threatening toxicities. |
| Group 1: (4)<br>Group 2: (3)<br>Group 3: (5)    | Fluconazole             | and<br>ondansetron  | C           | Ondansetron may enhance the QTc-prolonging effect of QT-prolonging Inhibitors (ondansetron)                             |           | Moderate CYP3A4                |                                                                                                                                                                                                                                                                                                        |
| Group 1: (25)<br>Group 2: (26)<br>Group 3: (25) | Fluconazole             | and<br>vincristine  | C           | Fluconazole may increase the serum concentration of vincristine.                                                        |           |                                | Monitor for increased vincristine toxicities.                                                                                                                                                                                                                                                          |
| Group 1: (0)<br>Group 2: (1)<br>Group 3: (1)    | Hydrochlorothiazide     | and<br>prednisolone | C           | Corticosteroids (Systemic) may enhance the hypokalemic effect of Thiazide and Thiazide-Like Diuretics.                  |           |                                | Monitor serum potassium. The addition of potassium-sparing diuretic and/or potassium supplementation may be necessary with concomitant treatment.                                                                                                                                                      |
| Group 1: (0)<br>Group 2: (0)<br>Group 3: (1)    | Ketoprofen              | and<br>prednisolone | C           | Corticosteroids (Systemic) may enhance the adverse/toxic effect of Nonsteroidal Anti-Inflammatory Agents (Nonselective) |           |                                | Monitor for signs of bleeding. Concomitant use may increase the risk of gastrointestinal bleeding.                                                                                                                                                                                                     |

**Cont. Table S8. Noteworthy drug-drug interactions encountered during the study period.**

|                                                                   |                                                     |                            |                                                                                                                   |                                                                                                                                                                                                                 |
|-------------------------------------------------------------------|-----------------------------------------------------|----------------------------|-------------------------------------------------------------------------------------------------------------------|-----------------------------------------------------------------------------------------------------------------------------------------------------------------------------------------------------------------|
| <b>Group 1: (0)</b><br><b>Group 2: (0)</b><br><b>Group 3: (1)</b> | <b>Loratadine</b><br><br><b>hydrochlorothiazide</b> | <b>and</b><br><br><b>C</b> | Anticholinergic Agents (Loratadine) may increase the serum concentration of Thiazide and Thiazide-Like Diuretics. | Monitor for an increased response to thiazide diuretics during concomitant treatment with an anticholinergic agent, particularly when anticholinergic doses are sufficient to reduce gastrointestinal motility. |
| <b>Group 1: (1)</b><br><b>Group 2: (0)</b><br><b>Group 3: (0)</b> | <b>Rifampicin</b><br><br><b>vincristine</b>         | <b>and</b><br><br><b>C</b> | Strong CYP3A4 Inducers (Rifampicin) may decrease the serum concentration of vincristine.                          | Monitor for reduced vincristine efficacy if combined with rifampicin.                                                                                                                                           |
| <b>Group 1: (1)</b><br><b>Group 2: (2)</b><br><b>Group 3: (2)</b> | <b>Voriconazole</b><br><br><b>prednisolone</b>      | <b>and</b><br><br><b>C</b> | Strong CYP3A4 Inhibitors (voriconazole) may increase the serum concentration of prednisolone.                     | Monitor for increased steroid-related adverse effects.                                                                                                                                                          |
| <b>Group 1: (1)</b><br><b>Group 2: (2)</b><br><b>Group 3: (3)</b> | <b>Voriconazole</b><br><br><b>Vincristine</b>       | <b>and</b><br><br><b>D</b> | Strong CYP3A4 Inhibitors (voriconazole) may increase the serum concentration of vincristine.                      | Seek alternatives to this combination when possible. If combined, monitor closely for vincristine toxicities.                                                                                                   |

C: Monitor therapy, D: Consider therapy modification, X: Avoid combination. All drug-drug interactions are produced utilizing online Lexicomp® interaction checker last accessed 25<sup>th</sup> May 2023. \*: The interaction recommendation is based on clinical trials of zosuquidar trihydrochloride and cyclosporin interacting with doxorubicin [1,2]. However, diosmin has been evaluated in several studies in which it reduced doxorubicin adverse effects such as nephrotoxicity [3], cardiotoxicity [4] and hepatotoxicity [5,6] and enhanced its antitumor activity[7]



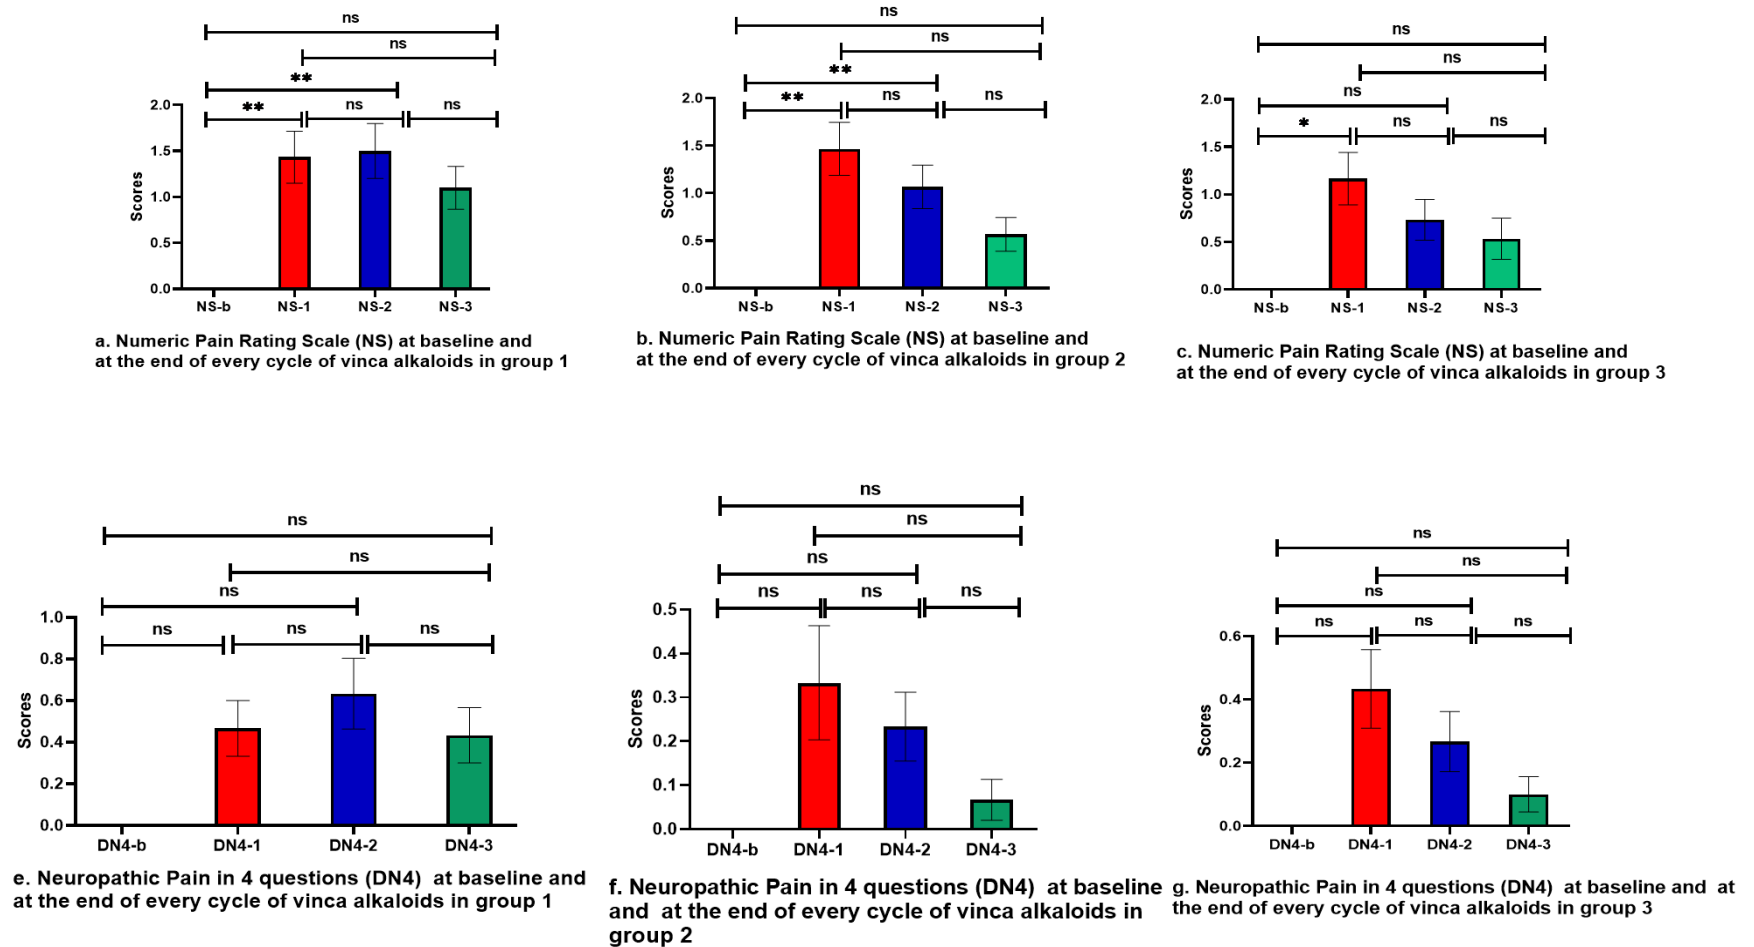

**Figure S1. Numeric pain rating scale (NS) and douleur neuropathique 4 (DN4) pairwise comparisons at baseline and the end of every cycle of vinca alkaloids in each group.**

Pairwise comparisons were done utilizing Dunn's correction, data are expressed as median with range, ns: not statistically significant, \*:  $p < 0.05$ , \*\*:  $p < 0.01$ , \*\*\*:  $p < 0.001$ .

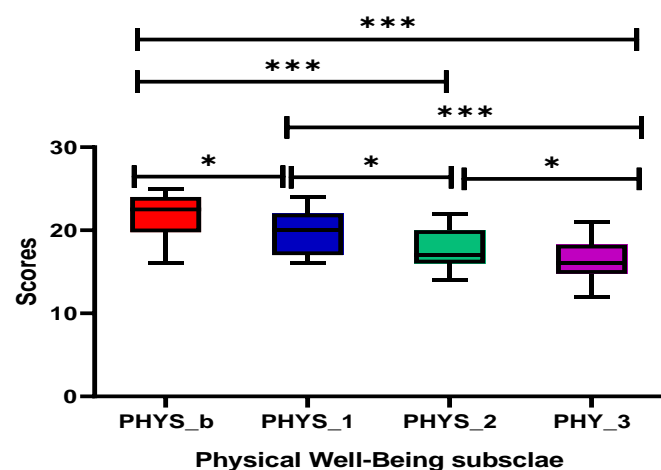

**a. Physical Well-Being Subscale scores in group 1 at baseline and at the end of every cycle of Vinca alkaloids**

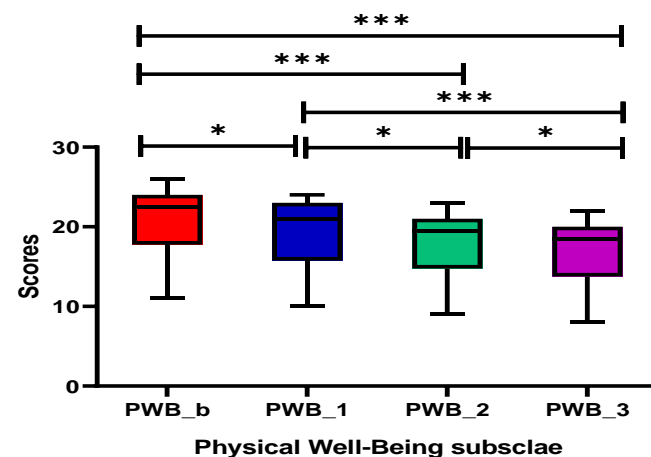

**b. Physical Well-Being Subscale scores in group 2 at baseline and at the end of every cycle of Vinca alkaloids**

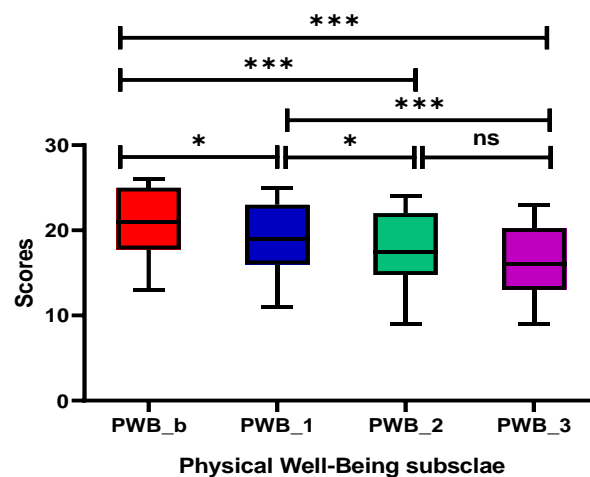

**c. Physical Well-Being Subscale scores in group 3 at baseline and at the end of every cycle of Vinca alkaloids**

**Figure S2. Physical well-being subscale scores in the three groups at baseline and at the end of every cycle of the three cycles of vinca alkaloids.**

Pairwise comparisons were done utilizing Dunn's correction, data are expressed as median and IQR, ns: not statistically significant, \*:  $p < 0.05$ , \*\*:  $p < 0.01$ , \*\*\*:  $p < 0.001$ .

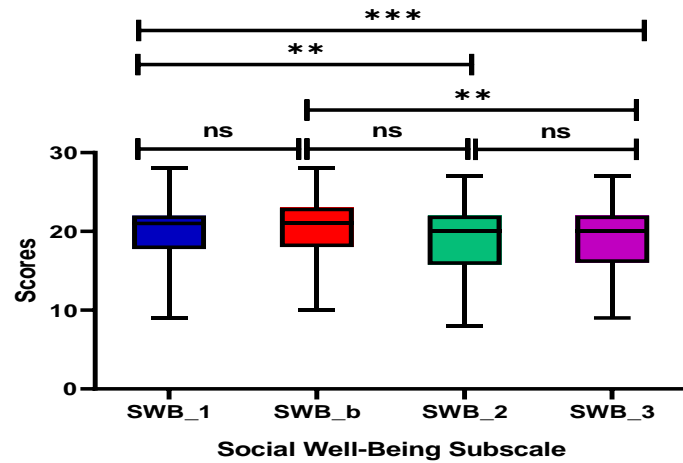

**a. Social Well-Being scores in group 1 at baseline and after the end of every cycle of Vinca alkaloids**

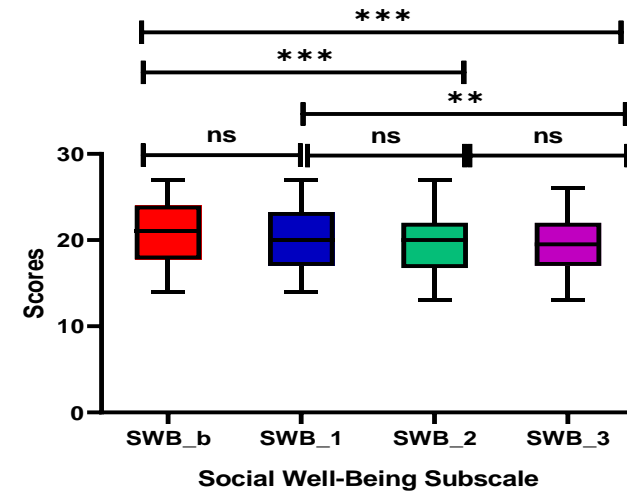

**b. Social Well-Being scores in group 2 at baseline and after the end of every cycle of Vinca alkaloids**

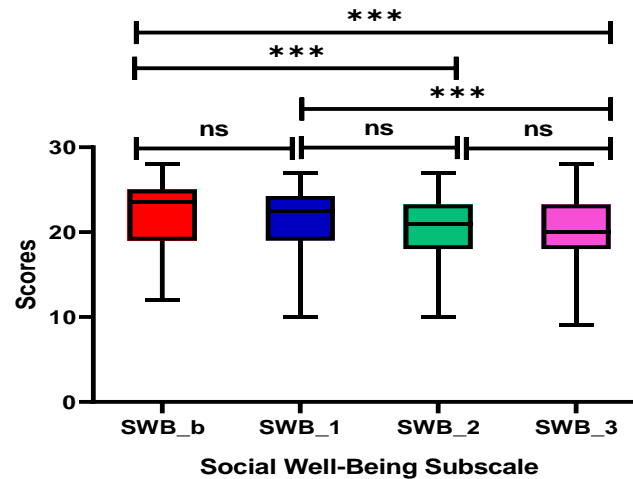

**c. Social Well-Being scores in group 3 at baseline and after the end of every cycle of Vinca alkaloids**

**Figure S3. Social well-being subscale scores in the three groups at baseline and at the end of every cycle of the three cycles of vinca alkaloids.**

Pairwise comparisons were done utilizing Dunn's correction, data are expressed as median and IQR, ns: not statistically significant, \*:  $p < 0.05$ , \*\*:  $p < 0.01$ , \*\*\*:  $p < 0.001$ .

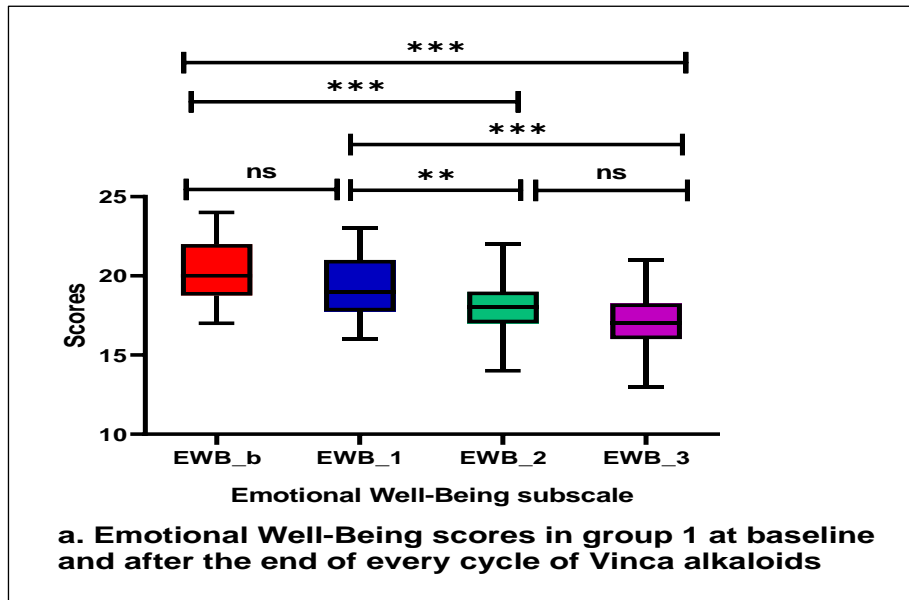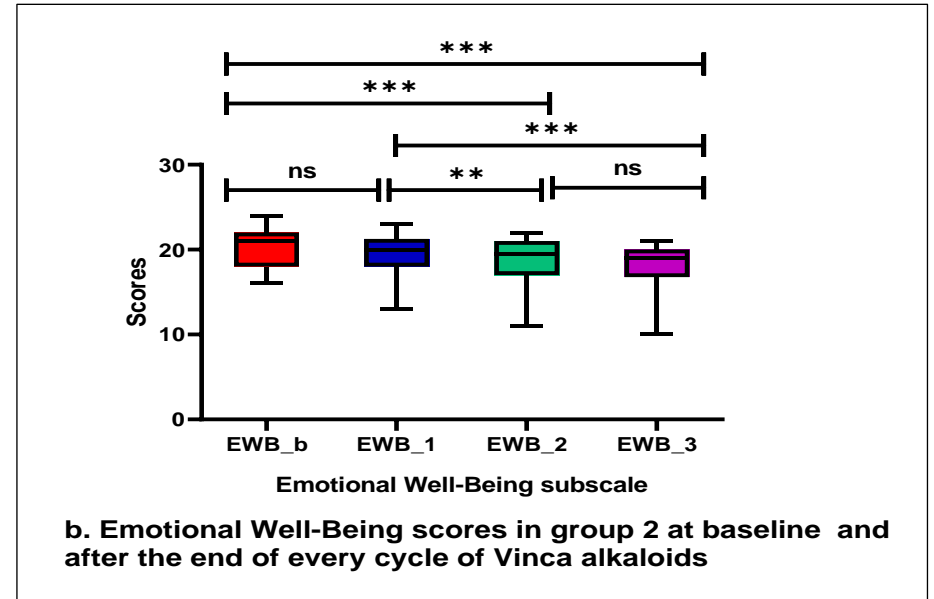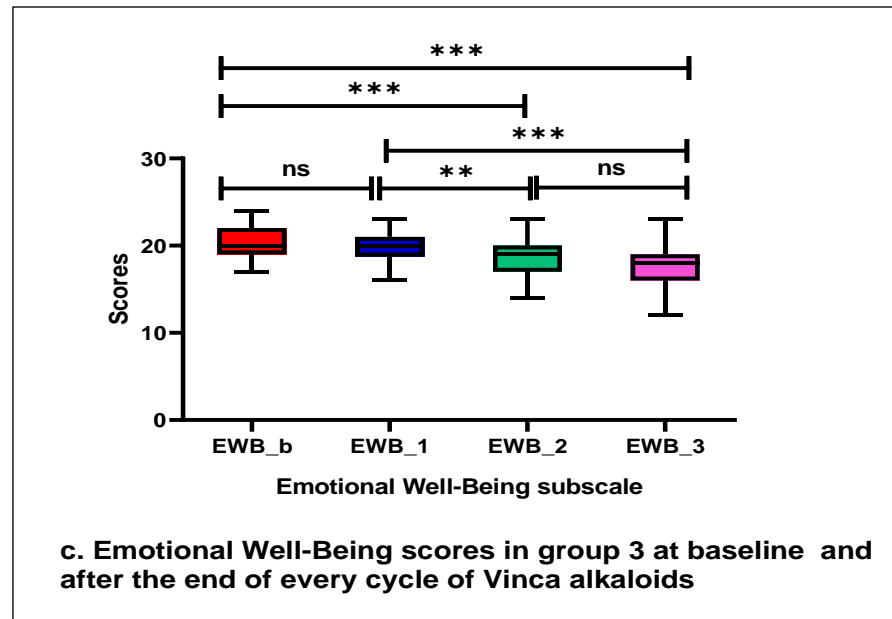

**Figure S4. Emotional well-being subscale scores in the three groups at baseline and at the end of every cycle of the three cycles of vinca alkaloids.**

Pairwise comparisons were done utilizing Dunn's correction, data are expressed as median and IQR, ns: not statistically significant, \*:  $p < 0.05$ , \*\*:  $p < 0.01$ , \*\*\*:  $p < 0.001$ .

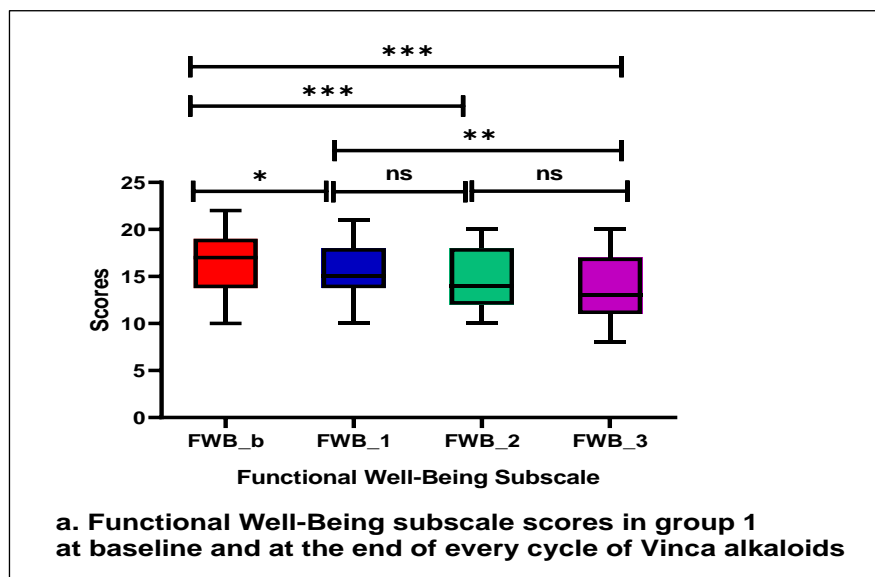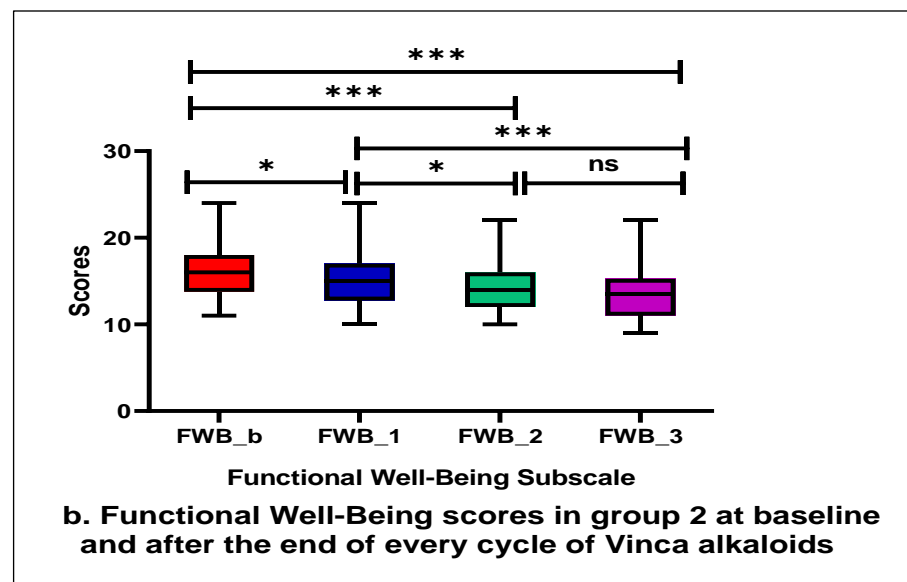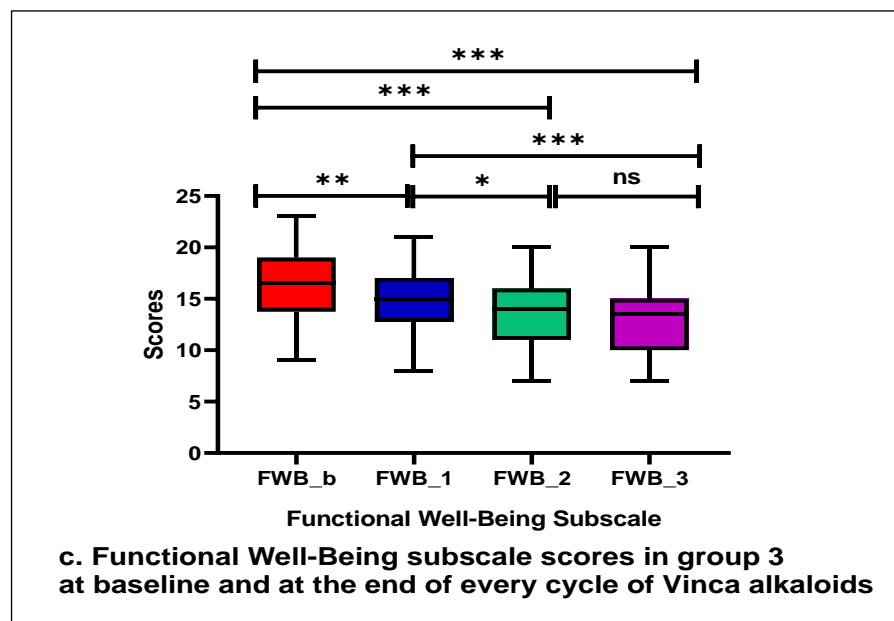

**Figure S5. Functional well-being subscale scores in the three groups at baseline and at the end of every cycle of the three cycles of vinca alkaloids.**

Pairwise comparisons were done utilizing Dunn's correction, data are expressed as median and IQR, ns: not statistically significant, \*:  $p < 0.05$ , \*\*:  $p < 0.01$ , \*\*\*:  $p < 0.001$ .

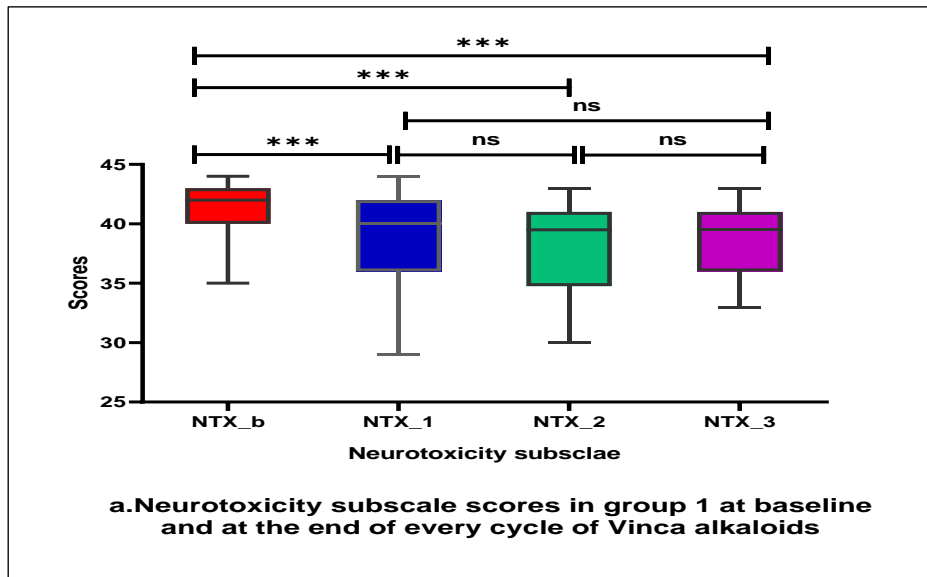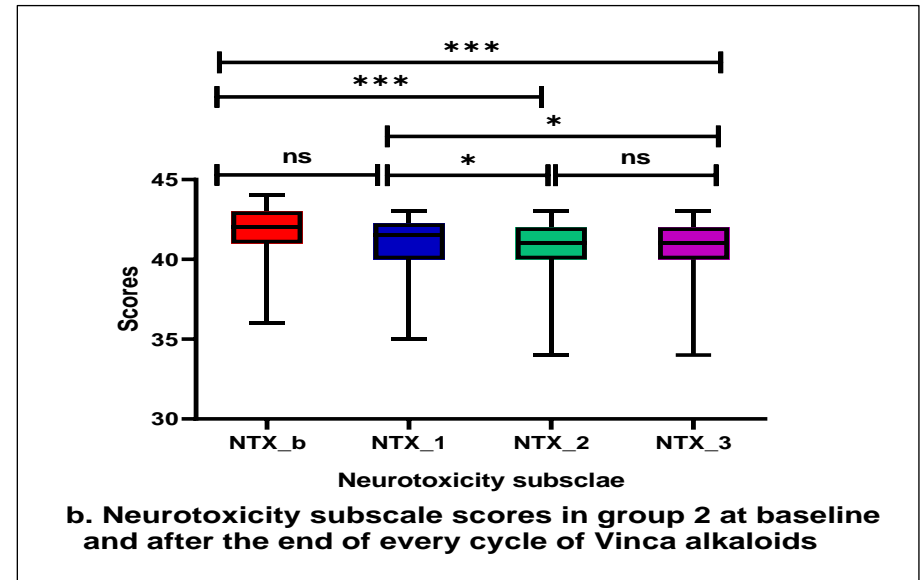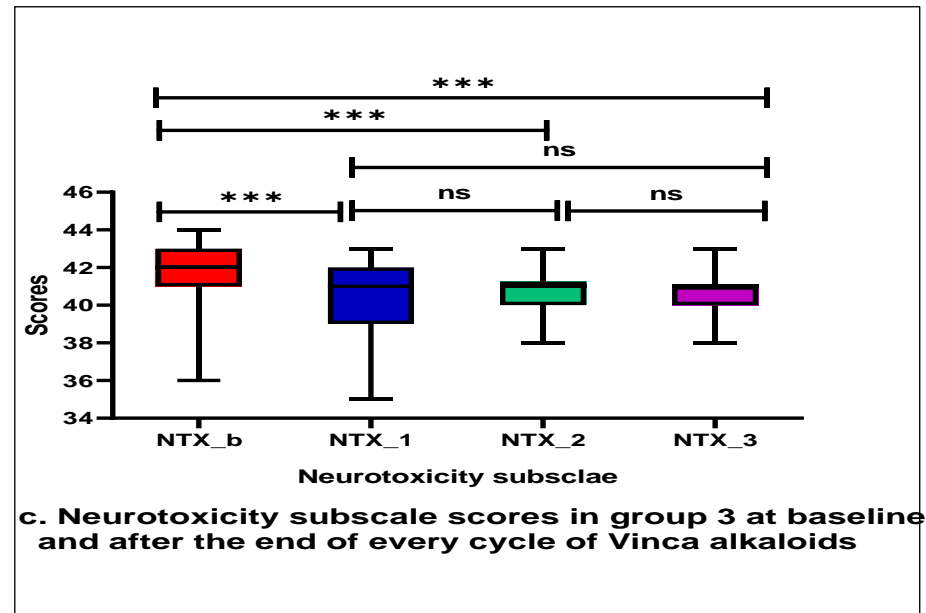

**Figure S6. Neurotoxicity subscale scores in the three groups at baseline and at the end of every cycle of the three cycles of vinca alkaloids.** Pairwise comparisons were done utilizing Dunn's correction, data are expressed as median and IQR, ns: not statistically significant, \*:  $p < 0.05$ , \*\*:  $p < 0.01$ , \*\*\*:  $p < 0.001$ .

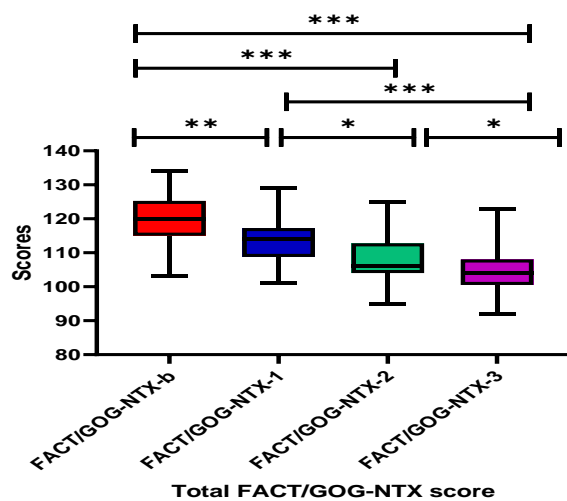

a. Total FACT/GOG-NTX scores in group 1 at baseline and at the end of every cycle of Vinca alkaloids

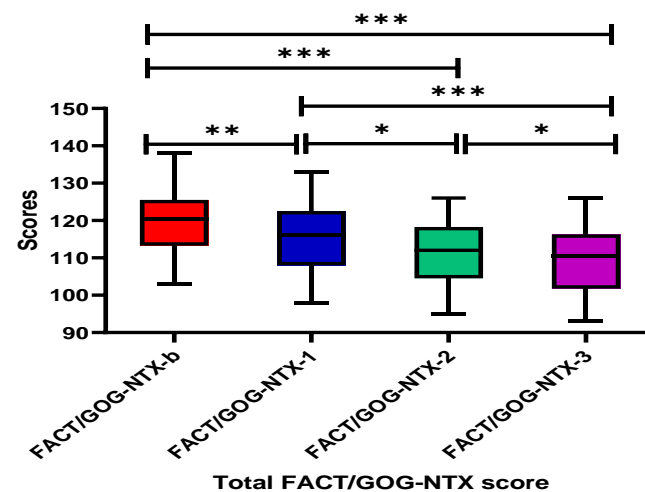

b. Total FACT/GOG-NTX scores in group 2 at baseline and at the end of every cycle of Vinca alkaloids

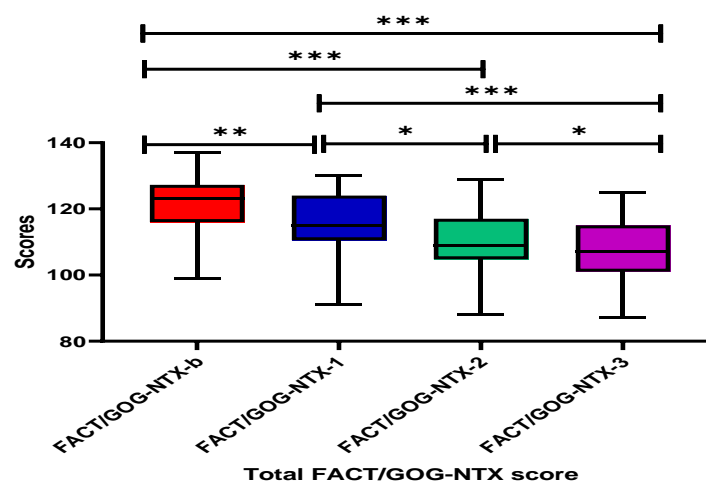

c. Total FACT/GOG-NTX scores in group 3 at baseline and at the end of every cycle of Vinca alkaloids

**Figure S7. FACT/GOG NTx total scores in the three groups at baseline and at the end of every cycle of the three cycles of vinca alkaloids.** Pairwise comparisons were done utilizing Dunn's correction, data are expressed as median and IQR, ns: not statistically significant, \*:  $p < 0.05$ , \*\*:  $p < 0.01$ , \*\*\*:  $p < 0.001$ .

**Timing of adverse drug effects:**

Cox Regression analysis pairwise comparisons of paresthesia showed increase in the risk of developing paresthesia in group 1 compared to group 2 ( $p=0.011$ , HR 0.2, 95 % CI (0.058-0.691)), higher risk in group 1 compared to group 3 ( $p=0.007$ , HR 0.365, 95 % CI (0.175-0.764)) but no significant difference between group 2 and group 3 ( $p=0.657$ , HR 0.667, 95 % CI (0.111-3.99)).

Cox Regression analysis Pairwise comparisons of dysuria showed no difference between group 1 and group 2 ( $p=0.099$ , HR 0.333, 95 % CI (0.09-1.231)), between group 1 and group 3 ( $p=0.054$ , HR 0.471, 95 % CI (0.219-1.014)) or between group 2 and group 3 ( $p=0.657$ , HR 0.667, 95 % CI (0.111-3.99)). However, the risk of developing dysuria was higher in group 1 than in group 2 and group 3



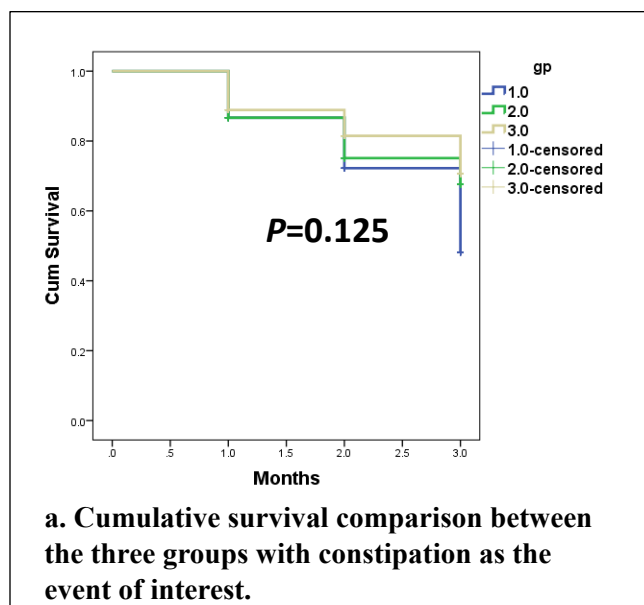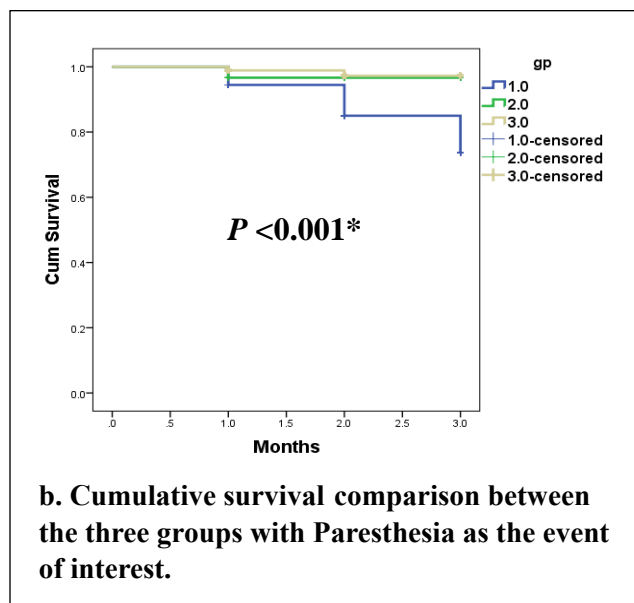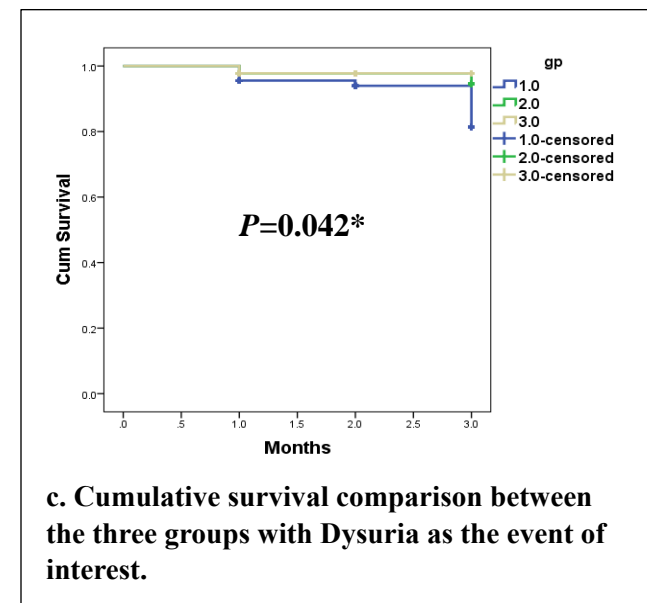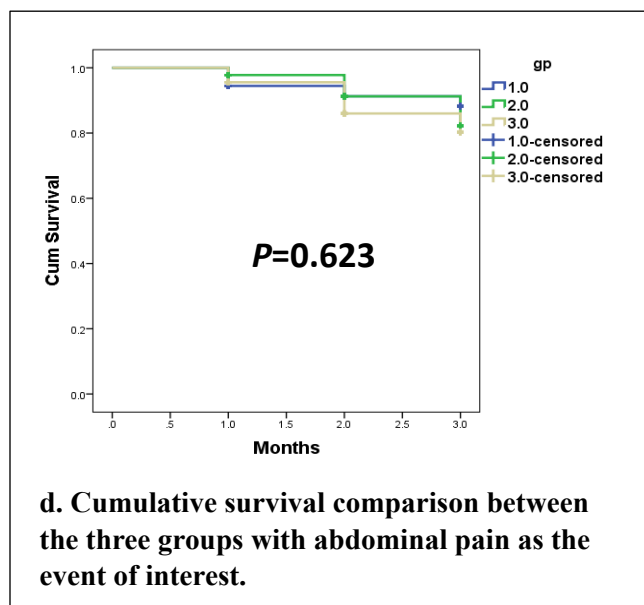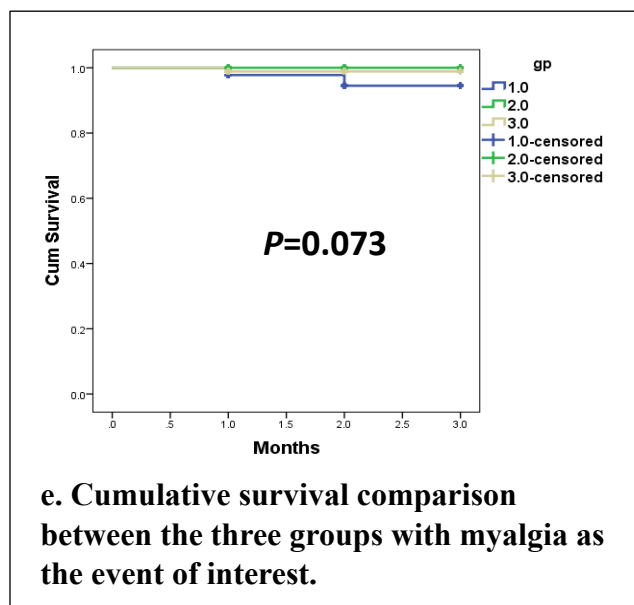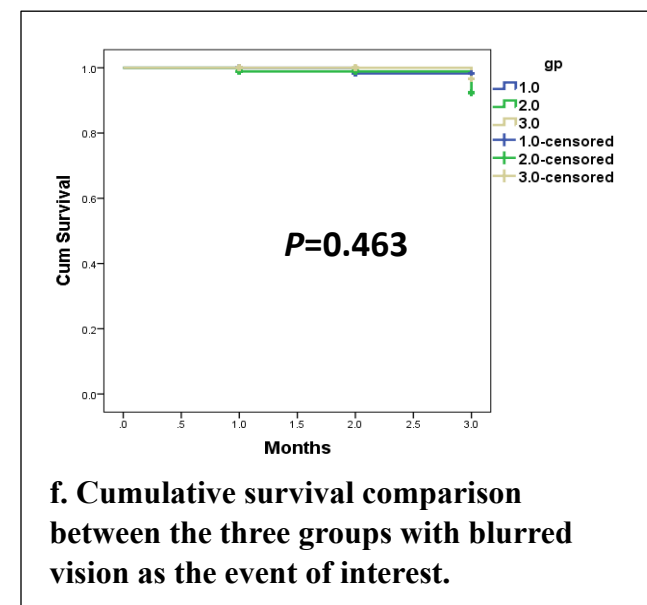

**Figure S8. Cumulative survival comparisons between the three groups with constipation, paresthesia, dysuria, abdominal pain, myalgia, and blurred vision as the event of interest.**

Log rank  $p$ -values was computed using Kaplan Meier analysis, time is expressed in months  $p$ -values  $< 0.05$  are considered statistically significant.

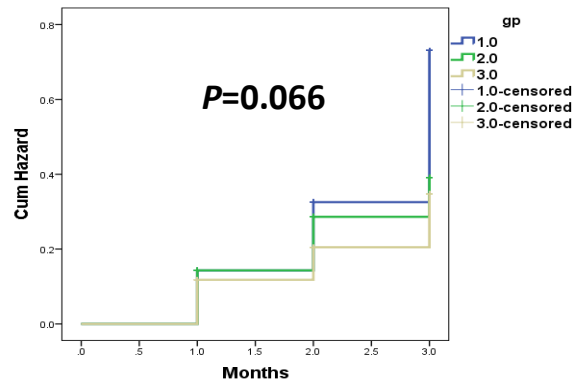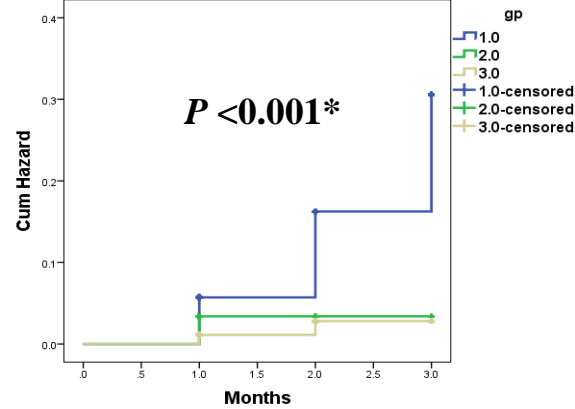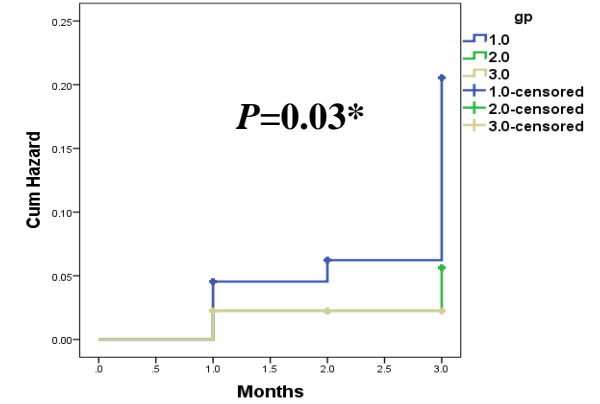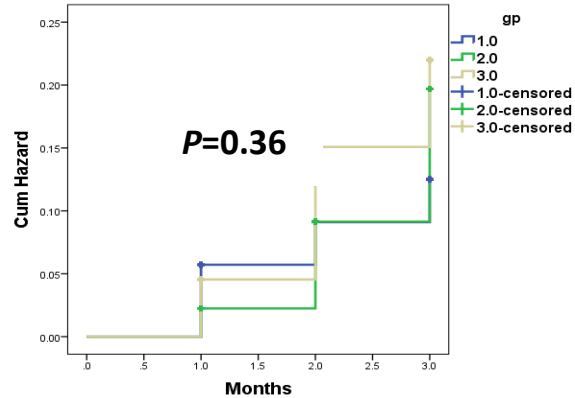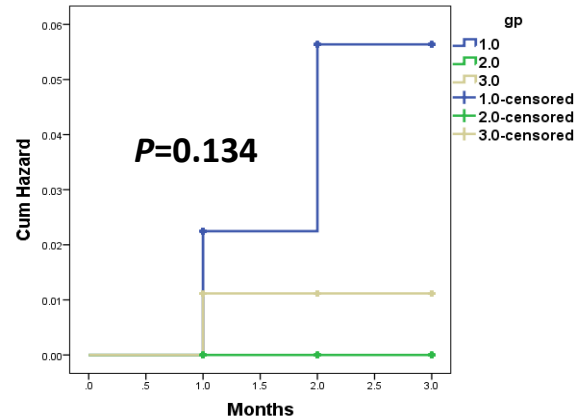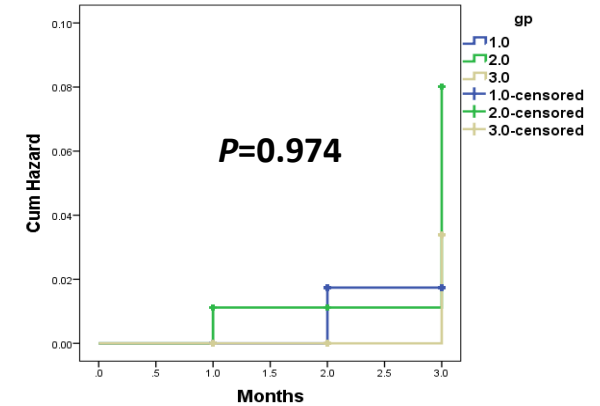

**Figure S9. Cumulative hazard comparisons between the three groups with constipation, paresthesia, dysuria, abdominal pain, myalgia, and blurred vision as the event of interest.**

Cox regression analysis was utilized for calculation of  $p$ -values, time is expressed in months  $p$ -values<0.05 are considered statistically significant.

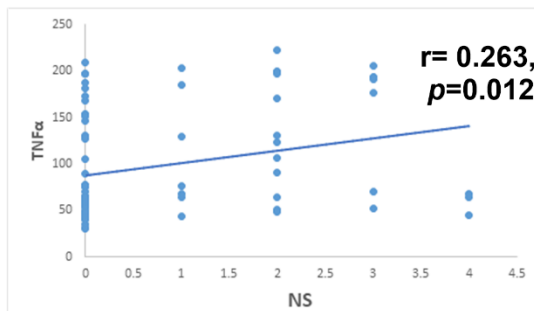

a. Correlation between NS and TNFα levels

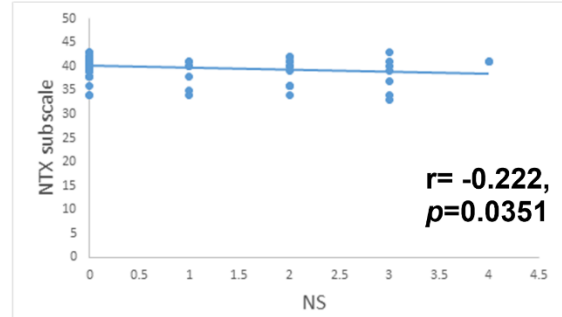

b. Correlation between NS and NTX subscale in FACT/GOG-Ntx score

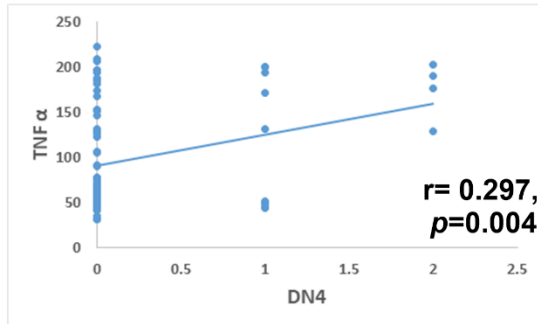

c. Correlation between DN4 and TNFα levels

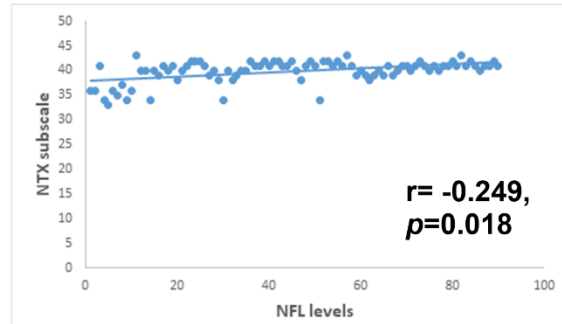

d. Correlation between NFL levels and NTX subscale in FACT/GOG-Ntx score

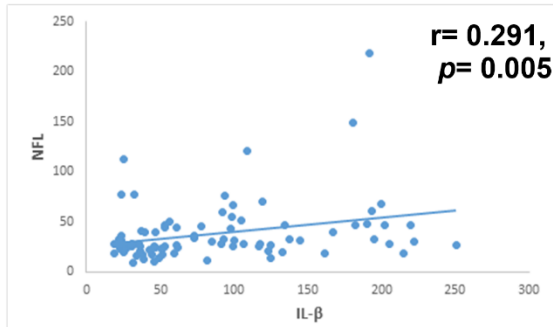

e. Correlation between NFL and IL 1-β levels after the third cycle of vinca alkaloids

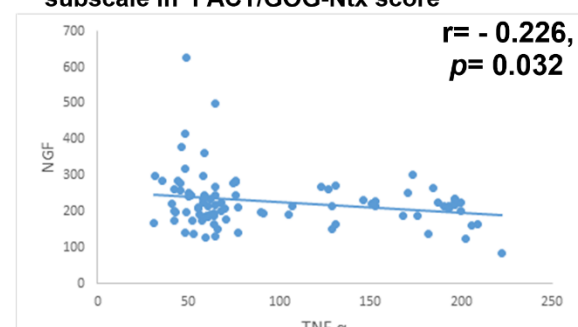

f. Correlation between NGF and TNF-α levels after the third cycle of vinca alkaloids

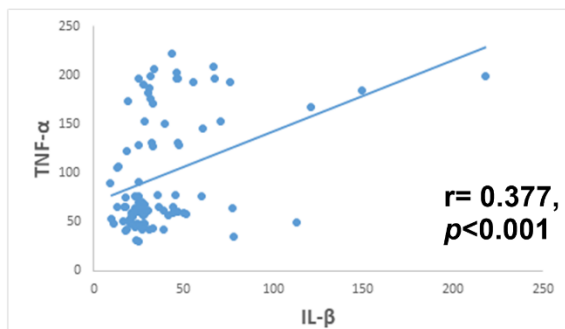

g. Correlation between TNF-α and IL 1-β levels after the third cycle of vinca alkaloids

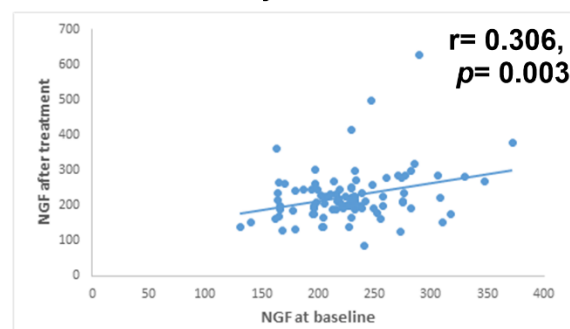

h. Correlation between NGF at baseline and NGF levels after the third cycle of vinca alkaloids

**Figure S10. Considerable correlations of neuropathy scores and serum biomarkers.**

## References

1. Sandler, A.; Gordon, M.; De Alwis, D.P.; Pouliquen, I.; Green, L.; Marder, P.; Chaudhary, A.; Fife, K.; Battiato, L.; Sweeney, C.; et al. A Phase I trial of a potent P-glycoprotein inhibitor, zosuquidar trihydrochloride (LY335979), administered intravenously in combination with doxorubicin in patients with advanced malignancy. *Clin. Cancer Res.* **2004**, *10*, 3265-3272, doi:10.1158/1078-0432.Ccr-03-0644.
2. Tidefelt, U.; Juliusson, G.; Elmhorn-Rosenborg, A.; Peterson, C.; Paul, C. Increased intracellular concentrations of doxorubicin in resistant lymphoma cells in vivo by concomitant therapy with verapamil and cyclosporin A. *Eur. J. Haematol.* **1994**, *52*, 276-282, doi:10.1111/j.1600-0609.1994.tb00096.x.
3. Ali, N.; AlAsmari, A.F.; Imam, F.; Ahmed, M.Z.; Alqahtani, F.; Alharbi, M.; AlSwayyed, M.; AlAsmari, F.; Alasmari, M.; Alshammari, A.; et al. Protective effect of diosmin against doxorubicin-induced nephrotoxicity. *Saudi J. Biol. Sci.* **2021**, *28*, 4375-4383, doi:https://doi.org/10.1016/j.sjbs.2021.04.030.
4. Santos, S.A.d. Protective activity of diosmin on doxorubicin-induced cardiotoxicity in mice with sarcoma. Federal University of Sergipe, 2022.
5. AlAsmari, A.F.; Alharbi, M.; Alqahtani, F.; Alasmari, F.; AlSwayyed, M.; Alzarea, S.I.; Al-Alallah, I.A.; Alghamdi, A.; Hakami, H.M.; Alyousef, M.K.; et al. Diosmin Alleviates Doxorubicin-Induced Liver Injury via Modulation of Oxidative Stress-Mediated Hepatic Inflammation and Apoptosis via NfκB and MAPK Pathway: A Preclinical Study. *Antioxidants* **2021**, *10*, 1998.
6. Madani, B.; Burzangi, A.; Alkreathy, H.; Karim, S.; Shaik, R.A.; Khan, L. Thymoquinone Prevents Doxorubicin-induced Hepatic-injury by Mitigating the Impairment of Mitochondrial Respiration and Electron Transport. *International Journal of Pharmaceutical Research & Allied Sciences* **2022**, *11*.
7. Musyayyadah, H.; Wulandari, F.; Nangimi, A.F.; Anggraeni, A.D.; Meiyanto, E. The growth suppression activity of diosmin and PGV-1 co-treatment on 4T1 breast cancer targets mitotic regulatory proteins. *Asian Pacific Journal of Cancer Prevention: APJCP* **2021**, *22*, 2929.
